# Supplementary material for: Association of Frailty, Organ Support, and Long-Term Survival in Critically Ill Patients With COVID-19
Source: PubMed Central journal article supplement — Crit Care Explor. 2022 May 25;4(6):e0712. doi: 10.1097/CCE.0000000000000712 (PMC9225491; doi:10.1097/cce.0000000000000712), 2022-05-25
Supplement: cc9-4-e0712-s001.pdf [file cc9-4-e0712-s001.pdf]

## **Association of frailty, organ support, and long-term survival in critically ill patients with COVID-19**

Leandro Utino Taniguchi<sup>1,2,3</sup>; Thiago Junqueira Avelino-Silva<sup>4,5</sup>; Murilo Bacchini Dias<sup>4</sup>; Wilson Jacob-Filho<sup>4</sup>; Márlon Juliano Romero Aliberti<sup>2,4</sup>; on behalf of CO-FRAIL Study Group and EPICCoV Study Group, for COVID HCFMUSP Study Group

1. Emergency Medicine Discipline, Hospital das Clinicas HCFMUSP, Faculdade de Medicina da Universidade de Sao Paulo, Sao Paulo, Brazil

2. Hospital Sirio Libanes, Sao Paulo, Brazil

3. Brazilian Research in Intensive Care Network (BRICNet), Sao Paulo, Brazil

4. Laboratorio de Investigacao Medica em Envelhecimento (LIM-66), Serviço de Geriatria, Hospital das Clinicas HCFMUSP, Faculdade de Medicina da Universidade de Sao Paulo, Sao Paulo, Brazil

5. Faculdade Israelita de Ciencias da Saude Albert Einstein, Hospital Israelita Albert Einstein, Sao Paulo, Brazil

Corresponding author: Leandro Utino Taniguchi, Emergency Medicine Discipline, Hospital das Clinicas HCFMUSP, Faculdade de Medicina da Universidade de Sao Paulo, Sao Paulo, Brazil, e-mail: leandrout@hotmail.com

This Supplemental Digital Content contains:

**Members of the CO-FRAIL Study Group, EPICCoV Study Group and COVID HCFMUSP Study Group**

**Figures**

Figure S1. Causal diagram represented by a directed acyclic graph (DAG) showing the conceptual model for the association between frailty, selected covariates and survival (page 5).

**Tables**

Table S1. Variables and scoring of the Frailty Index (page 6).

Table S2. Performance of different Clinical Frailty Scale (CFS) scores to identify frailty according to the Frailty Index (page 7).

**Members of the CO-FRAIL Study Group (in alphabetical order):**

Amanda Lagreca Venys; Ana Paula Valeriano Medeiros; Bianca Aparecida Garcia; Carolina B. Trindade; Christian Douradinho; Cintia Siloto Goulart Figueiredo; Claudia Kimie Suemoto; Claudia Szejf; Danute B Salotto; Fabio Campos Leonel; Felipe Vecchi Moreira; Gabriel Barros Furtado Léo Borges; Isabela Akie Shin-Ike; Isabella Motim Berger; Joao Francisco Lindenberg Schoueri; José Renato das Graças Amaral; Lara Mune de Oliveira Lima; Leonardo Rabelo de Melo; Leticia Harumi Sumita; Luma Lima e Silva Santos; Lumara Gonçalves Lages; Marcel Hiratsuka; Marcelo Altona; Marlos L V Moreira; Natalia de Castro Carvalho; Natalia Oliveira Trajano da Silva; Otávio Fortes do Rego-Júnior; Paula Cristina Eiras Poco; Paulo Henrique Lazzaris Coelho; Pollyana Clara Gomes Silva; Renata Cunha de Aguiar; Silvia de Fatima Takahashi; Tamires Martins; Valéria de Paula Richinho; Venceslau A Coelho; Victor José Dornelas Melo; Vivian I. Avelino-Silva.

**Members of the EPICCoV Study Group (in alphabetical order):**

Adriana Hirota, Alberto Kendy Kanasiro, Alessandra Crescenzi, Amanda Coelho Fernandes, Anna Miethke-Morais, Arthur Petrillo Bellintani, Artur Ribeiro Canasiro, Bárbara Vieira Carneiro, Beatriz Keiko Zanbon, Bernardo Pinheiro De Senna Nogueira Batista, Bianca Ruiz Nicolao, Bruno Adler Maccagnan Pinheiro Besen, Bruno Biselli, Bruno Rocha De Macedo, Caio Machado Gomes De Toledo, Carlos Roberto Ribeiro De Carvalho, Caroline Gomes Mol, Cassio Stipanich, Caue Gasparotto Bueno, Cibele Garzillo, Clarice Tanaka, Daniel Neves Forte, Daniel Joelsons, Daniele Robira, Eduardo Leite Vieira Costa, Elson Mendes Da Silva Júnior, Fabiane Aliotti Regalio, Gabriela Cardoso Segura, Giulia Sefrin Louro, Gustavo Brasil Marcelino, Yeh-Li Ho, Isabela Argollo Ferreira, Jeison de Oliveira Gois, Joao Manoel Da Silva Junior, Jose Otto Reusing Junior, Julia Fray Ribeiro, Juliana Carvalho Ferreira, Karine Vusberg Galleti, Katia Regina Silva, Larissa Padrao Isensee, Larissa dos Santos Oliveira, Leandro Utino Taniguchi, Leila Suemi Letaif, Lígia Trombetta Lima, Lucas Yongsoo Park, Lucas Chaves Netto, Luciana Cassimiro Nobrega, Luciana Haddad, Ludhmila Hajjar, Luiz Marcelo Malbouisson, Manuela Cristina Adsuara Pandolfi, Marcelo Park, Maria José Carvalho Carmona, Maria Castilho Prandini H De Andrade, Mariana Moreira Santos, Matheus Pereira Bateloche, Mayra Akimi Suiama, Mayron Faria de Oliveira, Mayson Laercio Sousa, Michelle Louvaes Garcia, Natassja Huemer,

Pedro Mendes, Paulo Ricardo Gessolo Lins, Pedro Gaspar Dos Santos, Pedro Ferreira Paiva Moreira, Renata Mello Guazzelli, Renato Batista Dos Reis, Renato Daltro De Oliveira, Roberta Muriel Longo Roepke, Rodolpho Augusto De Moura Pedro, Rodrigo Kondo, Samia Zahi Rached, Sergio Roberto Silveira Da Fonseca, Thais Sousa Borges, Thalissa Ferreira, Vilson Cobello Junior, Vivian Vieira Tenório Sales, Willaby Serafim Cassa Ferreira.

**Members of the COVID HCFMUSP Study Group (in alphabetical order):**

Alberto José da Silva Duarte; Aluisio C. Segurado; Amanda C. Montal; Anna Miethke-Morais; Anna Sara Shafferman Levin; Beatriz Perondi; Bruno A. M. P. Besen; Carlos R. R. Carvalho; Carolina Mendes do Carmo; Carolina dos Santos Lázari; Clarice Tanaka; Edivaldo M. Utiyama; Eloisa Bonfa; Éspér Georges Kallas; Ester Sabino; Fabiane Yumi Ogihara Kawano; Heraldo Possolo de Souza; Izabel Cristina Rios; Izabel Marcilio; Juliana C. Ferreira; Julio F. M. Marchini; Leila Harima; Luiz Marcelo Malbouisson; Marcello M. C. Magri; Marcelo C. Rocha; Maria Amélia de Jesus; Maria Cristina Peres Braido Francisco; Marjorie F. Silva; Maura Salaroli Oliveira; Solange R. G. Fusco; Thaís Guimarães; Tarcisio E. P. Barros-Filho; Yeh-Li Ho.

**Figure S1. Causal diagram represented by a directed acyclic graph (DAG) showing the conceptual model for the association between frailty, selected covariates and survival.**

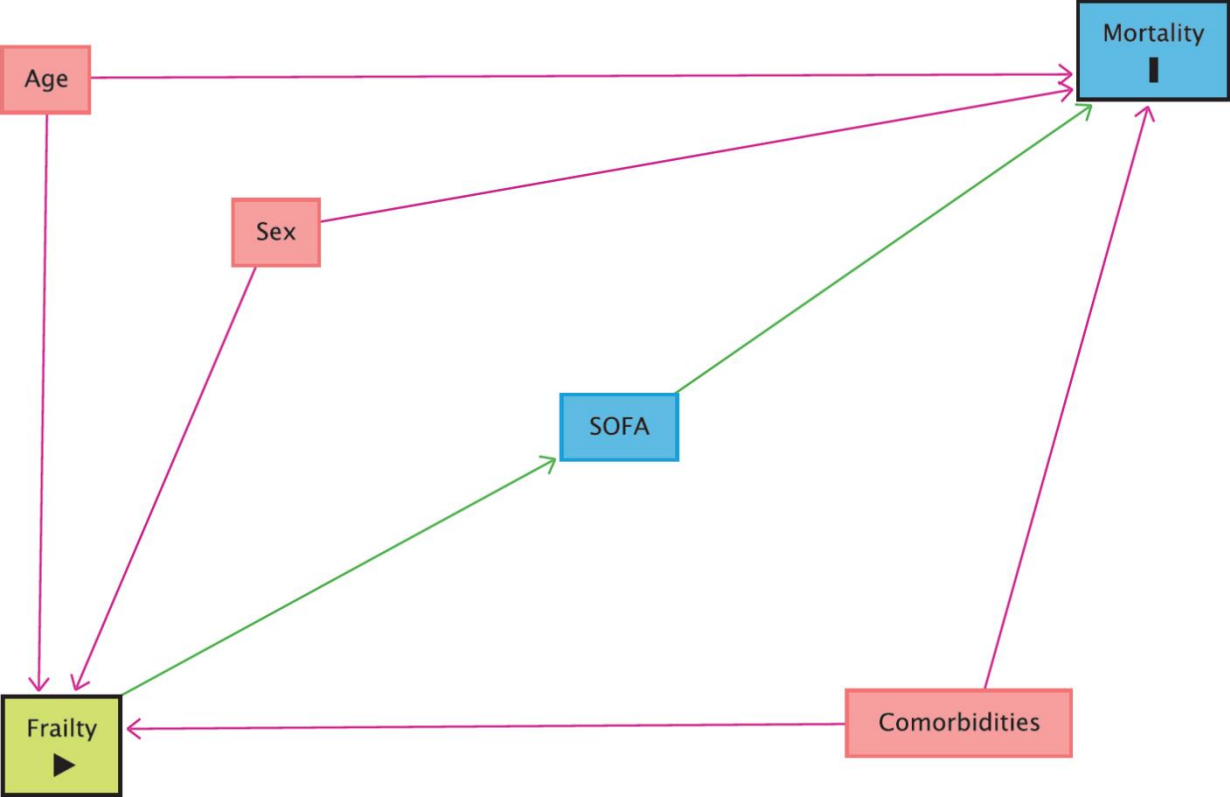

**Legend:** This conceptual model using Directed acyclic graph (DAG) shows clinically relevant variables associated with survival. Arrows indicate a suspected direct causal effect of one variable on another variable. Frailty is the main predictor, shown in green; variables associated with the outcome, but not associated with the main predictor, are shown in blue; variables associated with both the outcome and the main predictor, shown in red, are potential confounders (arrows indicated a suspected direct causal effect of that variable on both the main predictor and the outcome). A multivariable analysis of the effect of frailty on survival should be adjusted for all potential confounders.

**Table S1.** Variables and scoring of the Frailty Index.

| <b>Variables (40 items)</b>                       | <b>Cut-off values</b>                               |
|---------------------------------------------------|-----------------------------------------------------|
| Chronic obstructive pulmonary disease or asthma   | Yes=1   No=0                                        |
| Cerebrovascular disease                           | Yes=1   No=0                                        |
| Congestive heart failure                          | Yes=1   No=0                                        |
| Diabetes                                          | Yes=1   No=0                                        |
| Dementia                                          | Yes=1   No=0                                        |
| Liver disease                                     | Yes=1   No=0                                        |
| Myocardial infarction                             | Yes=1   No=0                                        |
| Atrial fibrillation                               | Yes=1   No=0                                        |
| Chronic kidney disease (moderate to severe)       | Yes=1   No=0                                        |
| Tumor (cancer)                                    | Yes=1   No=0                                        |
| Rheumatoid arthritis                              | Yes=1   No=0                                        |
| Peptic ulcer disease                              | Yes=1   No=0                                        |
| Peripheral vascular disease                       | Yes=1   No=0                                        |
| Hypertension                                      | Yes=1   No=0                                        |
| Depression                                        | Yes=1   No=0                                        |
| Falls occurrence in the previous 12 months        | Yes=1   No=0                                        |
| Polypharmacy ( $\geq 5$ medications)              | Yes=1   No=0                                        |
| Visual impairment                                 | Yes=1   No=0                                        |
| Hearing impairment                                | Yes=1   No=0                                        |
| Substantial memory complaints                     | Yes=1   No=0                                        |
| Hospital admission in the last six months         | Yes=1   No=0                                        |
| Body mass index (kilograms/meters <sup>2</sup> )  | $\geq 30$ or $< 18.5=1$   $25-30=0.5$   $18.5-25=0$ |
| Weight loss $\geq 4.5$ kilograms in the last year | Yes=1   No=0                                        |
| Fatigue most of the time                          | Yes=1   No=0                                        |
| Eating                                            | Unable=1   Need some help=0.5   Independent=0       |
| Dressing                                          | Unable=1   Need some help=0.5   Independent=0       |
| Transferring                                      | Unable=1   Need some help=0.5   Independent=0       |
| Grooming                                          | Unable=1   Need some help=0.5   Independent=0       |
| Bathing                                           | Unable=1   Need some help=0.5   Independent=0       |
| Toileting                                         | Unable=1   Need some help=0.5   Independent=0       |
| Urinary or fecal continence                       | Unable=1   Need some help=0.5   Independent=0       |
| Able to cut toenails                              | Unable=1   Need some help=0.5   Independent=0       |
| Walking across the room                           | Unable=1   Need some help=0.5   Independent=0       |
| Up and down stairs                                | Unable=1   Need some help=0.5   Independent=0       |
| Visit places near home                            | Unable=1   Need some help=0.5   Independent=0       |
| Taking medications                                | Unable=1   Need some help=0.5   Independent=0       |
| Housekeeping                                      | Unable=1   Need some help=0.5   Independent=0       |
| Cooking                                           | Unable=1   Need some help=0.5   Independent=0       |
| Shopping                                          | Unable=1   Need some help=0.5   Independent=0       |
| Using transportation                              | Unable=1   Need some help=0.5   Independent=0       |

**Table S2.** Performance of different Clinical Frailty Scale (CFS) scores to identify frailty according to the Frailty Index (N = 1,027\*).

| <b>Cut-off</b> | <b>Sensitivity</b> | <b>Specificity</b> | <b>+LR</b> | <b>-LR</b> |
|----------------|--------------------|--------------------|------------|------------|
| ≥1             | 1.00               | 0.00               | 1.00       | -          |
| ≥2             | 1.00               | 0.07               | 1.07       | 0.00       |
| ≥3             | 0.98               | 0.27               | 1.35       | 0.07       |
| ≥4             | 0.91               | 0.76               | 3.71       | 0.12       |
| ≥5             | 0.73               | 0.93               | 9.80       | 0.29       |
| ≥6             | 0.47               | 0.99               | 38.0       | 0.53       |
| ≥7             | 0.21               | 1.00               | -          | 0.79       |
| ≥8             | 0.03               | 1.00               | -          | 0.97       |

LR = likelihood ratio

Frailty Index >0.25 defined the presence of frailty; Youden index cut-off ≥ 4.

\*One missing value for the Frailty Index.

Frailty status was assessed in the period 2-4 weeks before hospitalization.
